# Supplementary material
Source: MDPI journal article supplement (https://www.mdpi.com/2073-4344/8/1/36)
Supplement: s1 [file s1]

# Supplementary Material: Catalytic Activity of Sulfated and Phosphated Catalysts towards the Synthesis of Substituted Coumarin

Nagi R. E. Radwan <sup>1,3,\*</sup>, Mohamed Hagar <sup>1,4</sup>, Tarek H. Afifi <sup>2</sup>, Fahd Al-wadaani <sup>2</sup> and Rawda M. Okasha <sup>2</sup>

## 2. Results and Discussion

### 2.2. FTIR Spectra of Samples

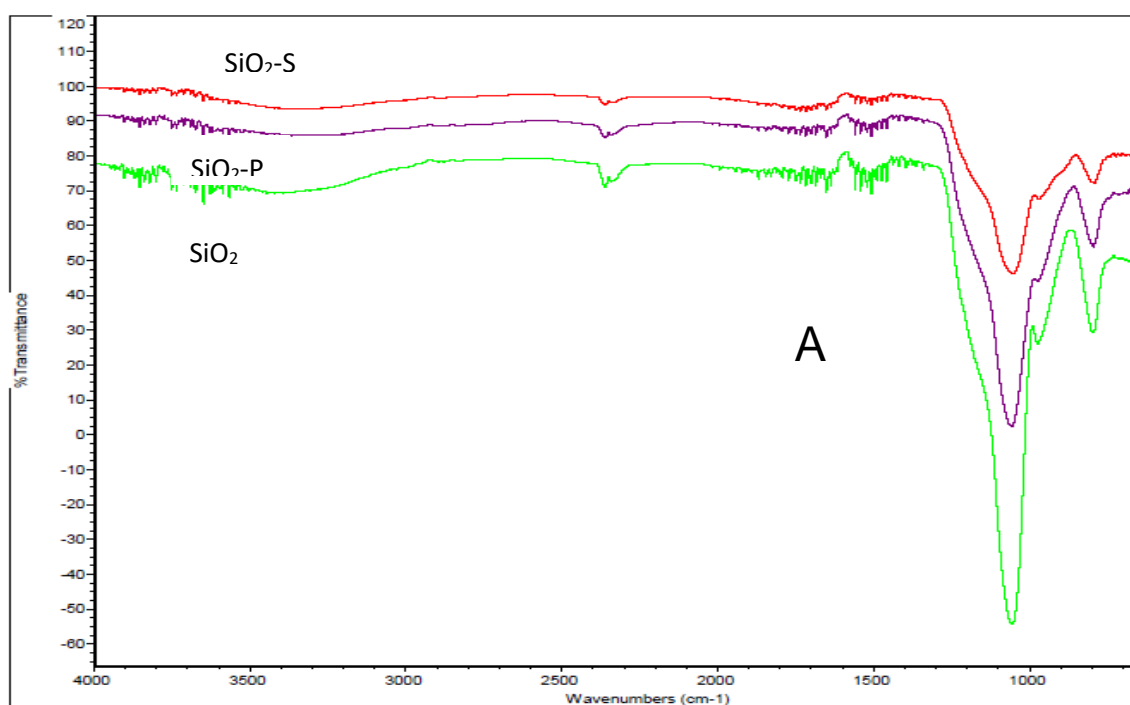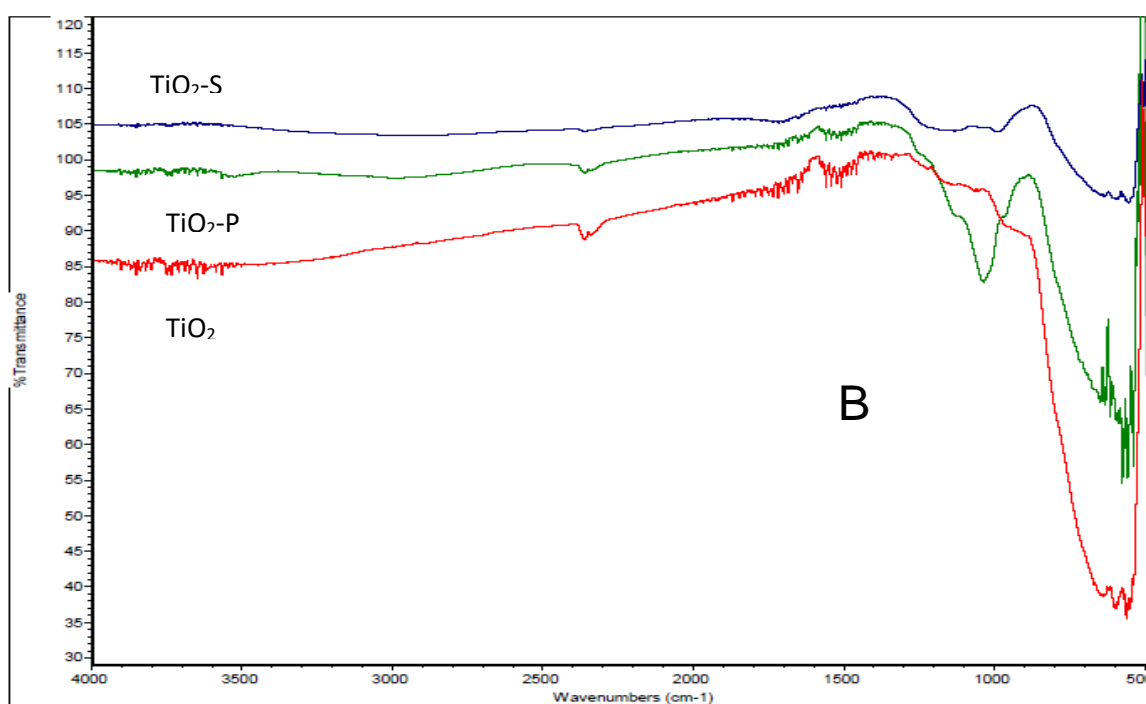

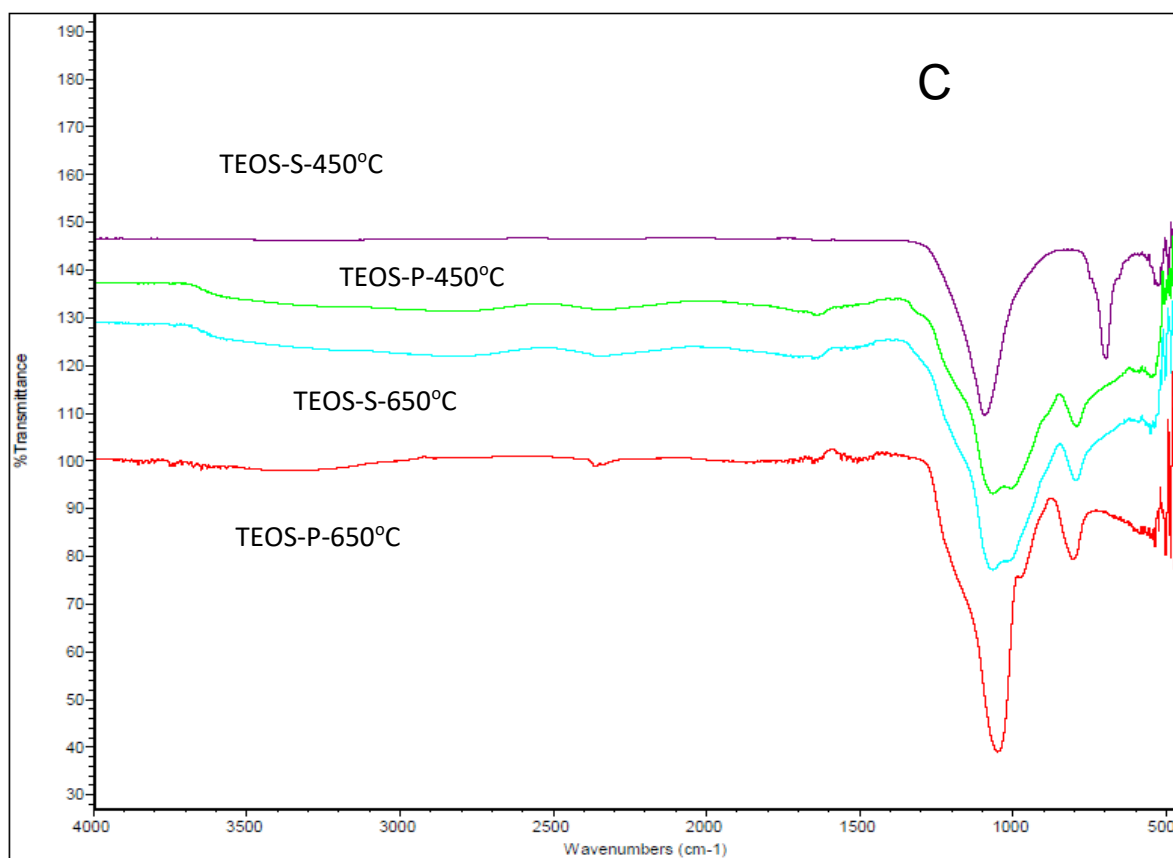

**Figure S1:** FTIR spectra of : (A) SiO<sub>2</sub> and treated with sulfuric acid SiO<sub>2</sub>-S and phosphoric acid SiO<sub>2</sub>-P, (B) TiO<sub>2</sub> and its treatment with sulfuric acid TiO<sub>2</sub>-S and phosphoric acid TiO<sub>2</sub>-P, and (C) silica prepared from TEOS treated with sulfuric and phosphoric acid calcined at 450 and 650°C.
